# Supplementary material
Source: PubMed Central journal article supplement (PMC4086200)
Supplement: ncomms4009-s1.pdf [file ncomms4009-s1.pdf]

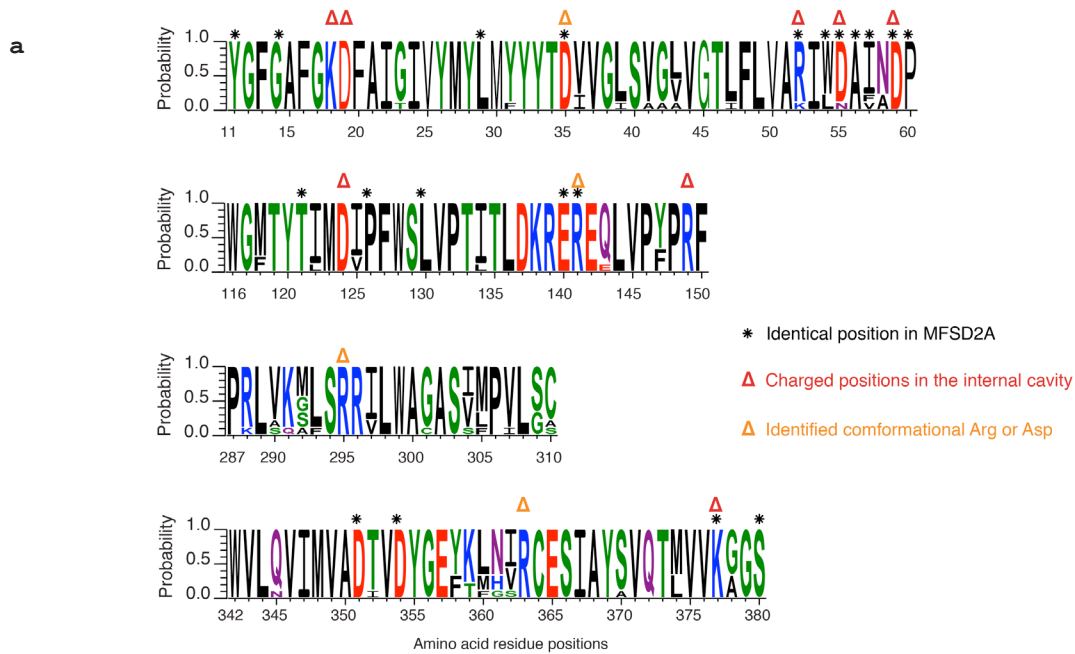

b

|                                 | Cation-binding site  | L-2                                     |
|---------------------------------|----------------------|-----------------------------------------|
| MelB_Salmonella typhimurium     | 48-FLVARIWDAINDP-60  | 120-YTIMDIPFWSLVPTITLTKRREQLVPFFPR-149  |
| MelB_Klebsiella pneumoniae      | 48-FLVARILDAIADP-60  | 120-YTIMDIPFWSLVPTITLTKRREQLVPYPRFF-149 |
| MelB_Enterobacter aerogenes     | 48-FLVARILDAIADP-60  | 120-YTIMDIPFWSLVPTITLTKRREQLVPYPR-149   |
| MelB_E.coli                     | 48-FLVARIWDAINDP-60  | 120-YTIMDIPFWSLVPTITLTKRREQLVPYPR-149   |
| MelB_Shigella flexneri          | 44-FLVARIWDAINDP-56  | 120-YTIMDIPFWSLVPTITLTKRREQLVPYPR-145   |
| MelB_Salmonella typhi           | 48-FLVARIWDAINDP-60  | 120-YTIMDIPFWSLVPTITLTKRREQLVPFFPR-149  |
| MelB_Salmonella paratyphi       | 48-FLVARIWDAINDP-60  | 120-YTIMDIPFWSLVPTITLTKRREQLVPFFPR-149  |
| MelB_Citrobacter freundii       | 48-FLVAKIWDAFNDP-60  | 120-YTIMDIPFWSLVPTITLTKRREQLVPYPR-148   |
| MelB_Vibrio shilonii            | 48-FLVARIWDAVNDP-60  | 120-YTLMDIPFWSLVPTITLTKRREELVPYPR-149   |
| LacS_Streptococcus thermophilus | 60-ISILRILEVFIDP-72  | 135-YSIKDIGFWSMLPALSLDSHREKMATFAR-164   |
| GalP_Lactococcus lactis         | 55-VVIRLVEHIFDP-68   | 133-YSFKDIAFWSMIPALSEKNSERETLGTFFAR-162 |
| XylP_Lactobacillus pentosus     | 72-FLVARIWDAFDGP-84  | 144-YSAVNIPITSLPSLTSNPQBRVTLSTIRQ-173   |
| GusB_E.coli                     | 50-LLVVRVDFADV-62    | 123-YSLVNIPIYGSLATAMTQQPQSRARLGAARG-152 |
| TogT_Klebsiella pneumoniae      | 45-FSVASIIDAINP-57   | 116-YTSIMVPYETLATEMTDDFSLRSKLTGYKA-145  |
| Sucrose transporter 1_Zea mays  | 76-WLCGPIAGLVVQP-88  | 161-DFSNNIVQGPARAMMADLCGHHGPSAANSI-190  |
| MFSD2A_Homosapiens              | 99-LFVGRAWDAITDP-111 | 171-VTCFHVYPYSALTMFISTEQTBRSATAYRM-200  |
| MFSD2B_Homosapiens              | 84-LFGGKVSAAADP-96   | 156-ATFFQVPYALTMLLTPCPREBRSATAYRM-185   |

  

|                                 | L-1                  | L-2                       | L-3 |
|---------------------------------|----------------------|---------------------------|-----|
| MelB_Salmonella typhimurium     | 287-PRLVKMLSRRI-297  | 351-DTVDYGEFKLNIRCE-365   |     |
| MelB_Klebsiella pneumoniae      | 287-PRLVKGLSRRI-297  | 351-DTVDYGEYTMNIRCE-365   |     |
| MelB_Enterobacter aerogenes     | 287-PRLVKGLSRRI-297  | 351-DTVDYGEYTMNIRCE-365   |     |
| MelB_E.coli                     | 287-PRLVKLSLRRRI-297 | 351-DIVDYGEYKLVHVRCE-365  |     |
| MelB_Shigella flexneri          | 283-PRLVKLSLRRRI-293 | 347-DTVDYGEYKLVHVRCE-361  |     |
| MelB_Salmonella typhi           | 287-PRLVKMLSRRI-297  | 351-DTVDYGEFKLNIRCE-365   |     |
| MelB_Salmonella paratyphi       | 287-PRLVKMLSRRI-297  | 351-DTVDYGEFKLNIRCE-365   |     |
| MelB_Citrobacter freundii       | 286-PRLSKALSRRV-296  | 350-DTVDYGEYKFNVRCE-364   |     |
| MelB_Vibrio shilonii            | 287-PKLAQMFSRRV-297  | 351-DTVDYGEYKLGSRCE-365   |     |
| LacS_Streptococcus thermophilus | 305-PSLAGKFNRRK-315  | 365-DSVEYGQWKTHRDE-379    |     |
| GalP_Lactococcus lactis         | 300-PTLAKKFGRRK-310  | 359-DSVEYGQWKNGVRNE-373   |     |
| XylP_Lactobacillus pentosus     | 308-PWTAKRIGKRN-318  | 370-DSVDYGEWKNGVRAE-384   |     |
| GusB_E.coli                     | 281-APLVPGMVARI-291  | 346-DTVEYGEYLTGVRIE-360   |     |
| TogT_Klebsiella pneumoniae      | 289-GLCVKKGFSKP-299  | 358-DVDEIYTGRRREGIY-372   |     |
| Sucrose Transporter 1_Zea mays  | 332-QISAFDEGVRV-342  | 398-DYHGYYQDAITASTS-412   |     |
| MFSD2A_Homosapiens              | 361-QWFLTRFGKKT-371  | 421-DVIDDFHLKQEHFHG-435   |     |
| MFSD2B_Homosapiens              | 337-EWWLQRFQKKT-346  | 395-DVVDVDFQLQRRHGGPG-409 |     |

**Supplementary Figure S1 | Sequence alignment.** **a**, The sequence logos generated by the Weblogo for MelB orthologues with MFSD2A. Four stretches (11-60, 116-150, 287-310, 342-360) of primary-sequence alignments of MelB<sub>St</sub> (Gene ID: 16767549) with other MelB orthologues from *Klebsiella pneumoniae*, GI:150957831; *Enterobacter aerogenes*, GI:3914018; *E. coli*, GI:353526256; *Salmonella typhi*, GI:20141536; *Shigella flexneri*, GI:81723953; *Salmonella paratyphi*, GI:81360816; *Citrobacter freundii*, GI:75416057; *Vibrio shilonii*, Uniprot:A6CV97; MFSD2A, GI: 74751132 (Weblogos3.0). **b**, MelB with other GPH members. MelB<sub>St</sub> (GI: 16767549) orthologues include *Klebsiella pneumoniae*, GI:150957831; *Enterobacter aerogenes*, GI:3914018; *E. coli*, GI:353526256; *Shigella flexneri*, GI:81723953; *Salmonella typhi*, GI:20141536; *Salmonella paratyphi*, GI:81360816; *Citrobacter freundii*, GI:75416057; and *Vibrio shilonii*, Uniprot:A6CV97. MelB homologues of GPH family include LacS of *Streptococcus thermophiles*, GI:386345083; GalP of *Lactococcus lactis*, GI:4995688; XylP of *Lactobacillus pentosus*, GI:3688059; GusB of *E. coli*, GI:292630909; Oligogalacturonide transporter (TogT) of *Klebsiella pneumoniae*, GI:206580788; Sucrose transporter 1 of *Zea mays*, GI:162463612; human MFSD2A, GI:74751132; and human MFSD2B, GI:298286913. Paired alignment of four stretches of primary sequences between MelB<sub>St</sub> and each protein were done manually. The three Asp residues (55, 59 and 124) important for Na<sup>+</sup> binding and three Arg (295, 141 and 363) and two Asp residues (351 and 354) important for lock interactions in MelB<sub>St</sub> are highlighted.

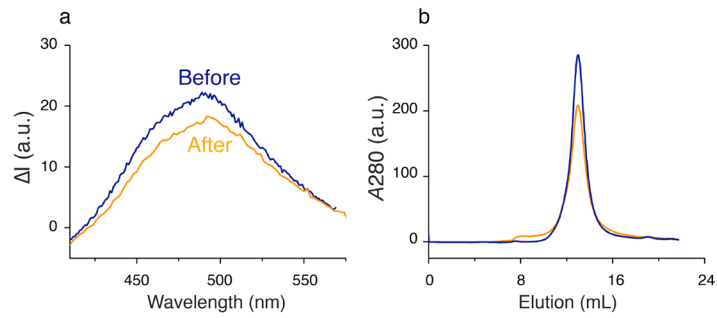

**Supplementary Figure S2 | Stability of MelB<sub>St</sub>.** Purified MelB<sub>St</sub> proteins were incubated at 23°C for five days, and the samples before (blue) and after (orange) incubation were tested for stability. **a**, D<sup>2</sup>G binding. D<sup>2</sup>G FRET emission spectra ( $\Delta I$ ) obtained by displacement of D<sup>2</sup>G with 50 mM melibiose. **b**, Gel filtration chromatography profiles (100  $\mu$ g MelB<sub>St</sub>).

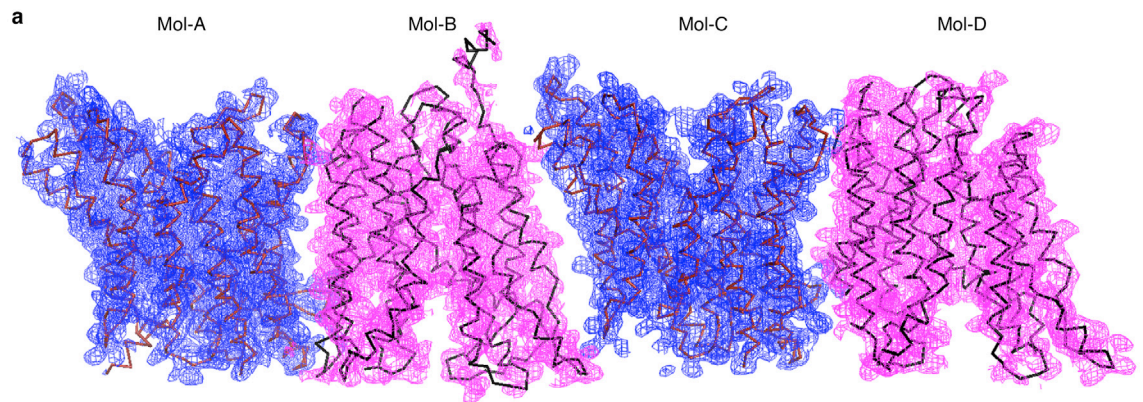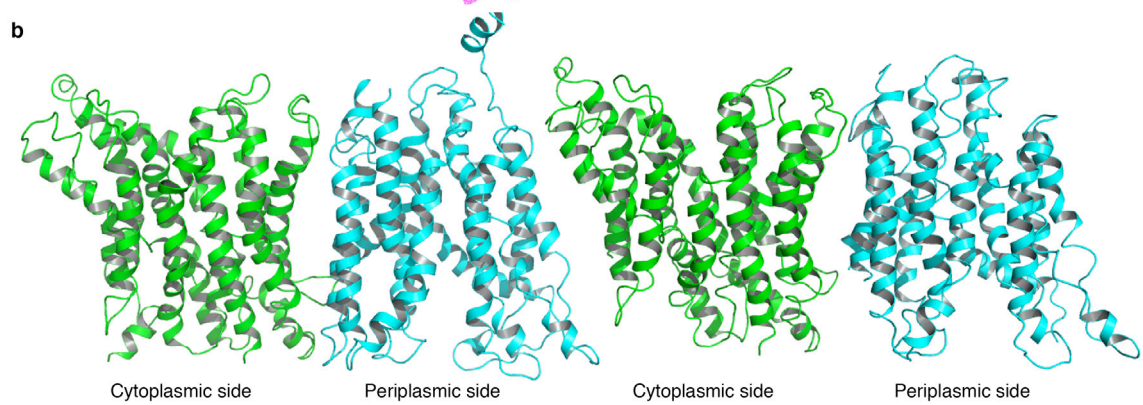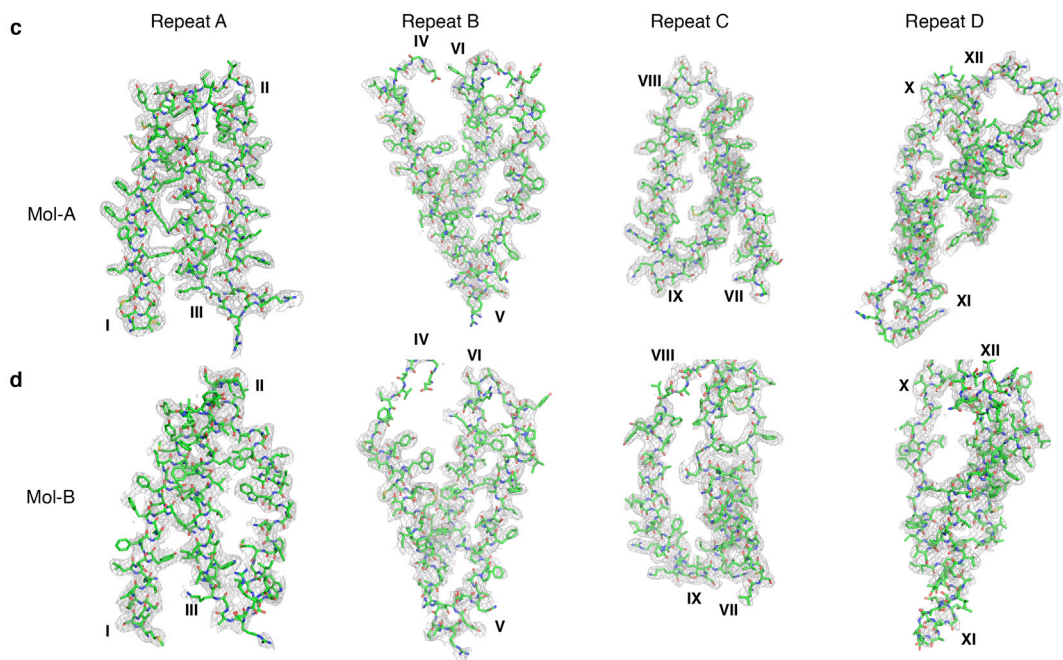



**Supplementary Figure S3 | Electron density maps of MelB<sub>st</sub>.** **a**, The 2Fo-Fc maps of four molecules of MelB<sub>st</sub> contoured at 1.0  $\sigma$ . Mol-A and Mol-C (blue mesh) and Mol-B and Mol-D (pink mesh) are related by 0.5 pseudo-translational symmetry along the *c* axis. **b**, The overall fold of Mol-A and Mol-C (green), Mol-B and Mol-D (cyan) in the asymmetric unit are shown as cartoon models. The N-terminal domain is on the left side of each molecule. **c and d**, The 2Fo-Fc electron density maps contoured at 1.0  $\sigma$  for helices in each repeats. The helices are oriented for clear views of the density maps.

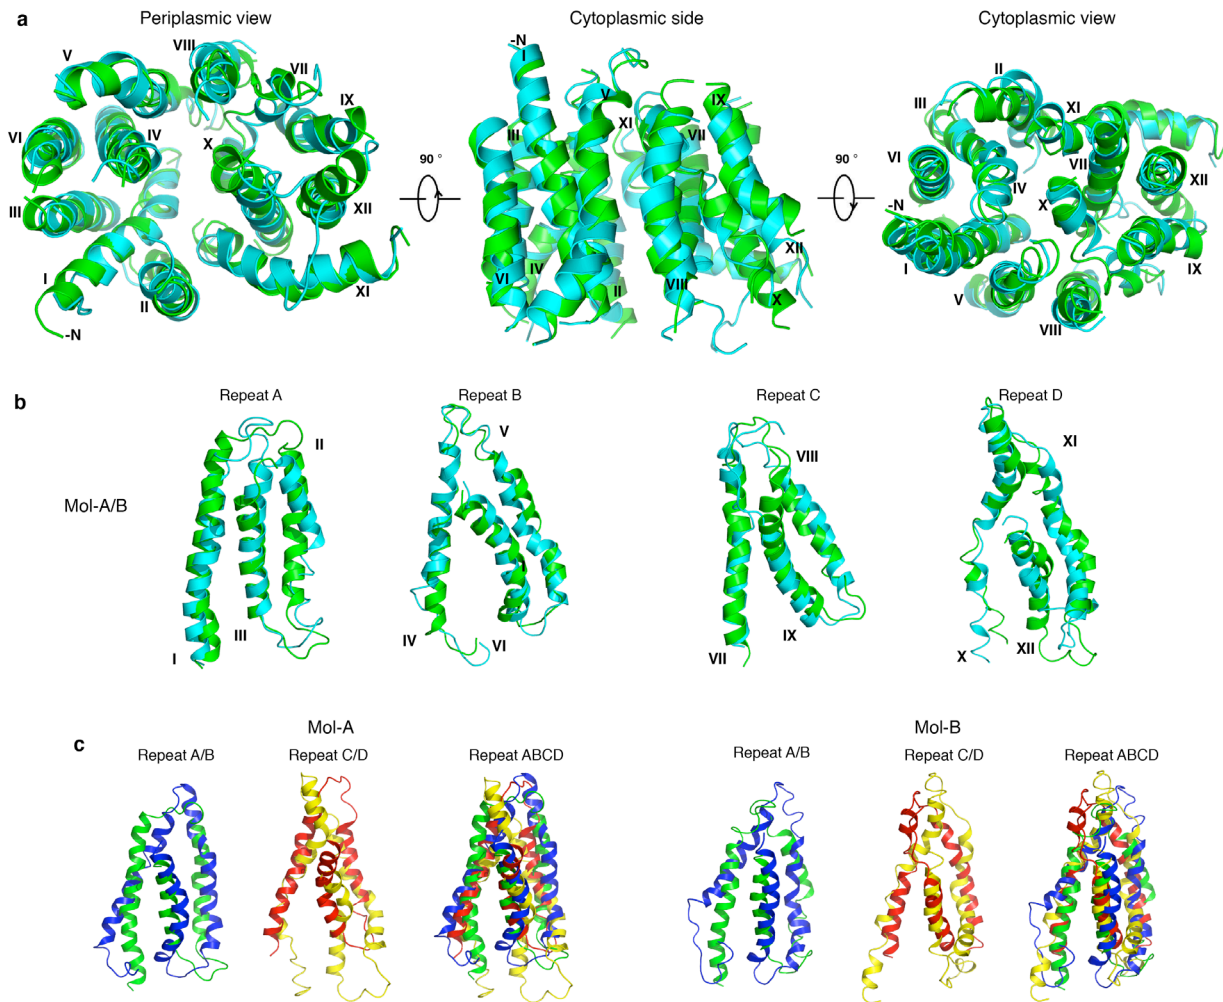

**Supplementary Figure S4 | Repeats of MelB<sub>St</sub>.** **a**, Superposition of the overall structure of Mol-B (cyan) on Mol-A (green) viewed parallel or perpendicular to the membrane plane. **b**, Superposition of the overall structure of Mol-B (cyan) on Mol-A (green) is presented by four separate repeats. **c**, Superposition of repeats.

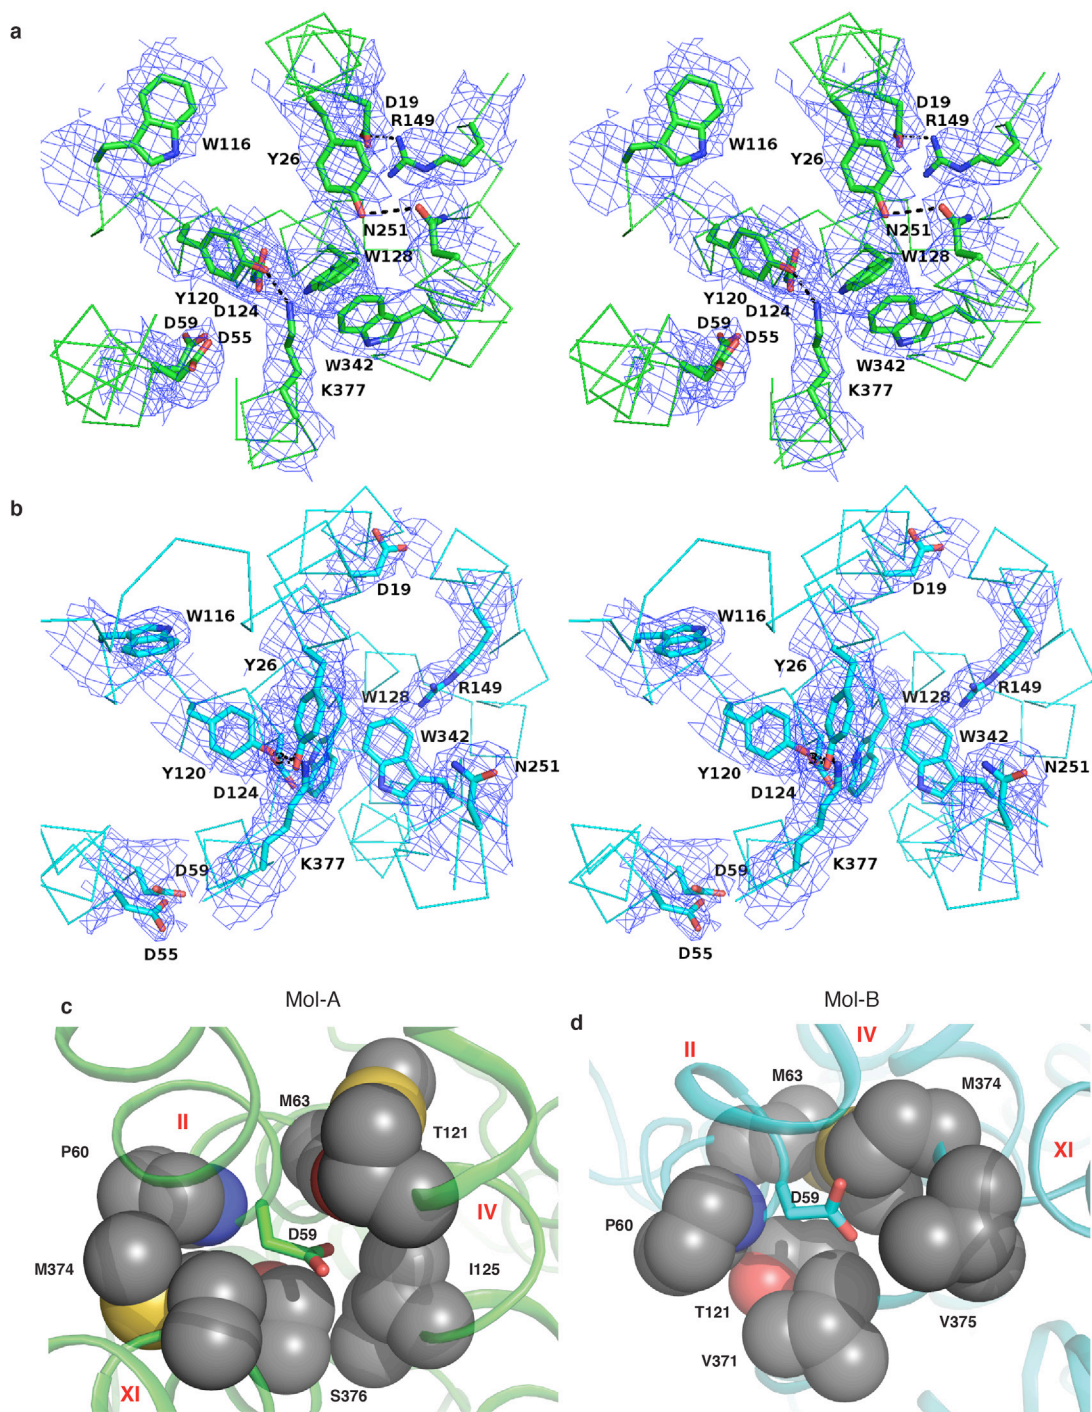

**Supplementary Figure S5 | The internal cavity.** Wall-eyed stereo view of the 2Fo-Fc maps of the cation- and sugar-binding residues in Mol-A (**a**) and Mol-B (**b**) contoured at 1.0  $\sigma$ . Asp<sup>59</sup> is surrounded by hydrophobic residues in Mol-A (**c**) and in Mol-B (**d**).

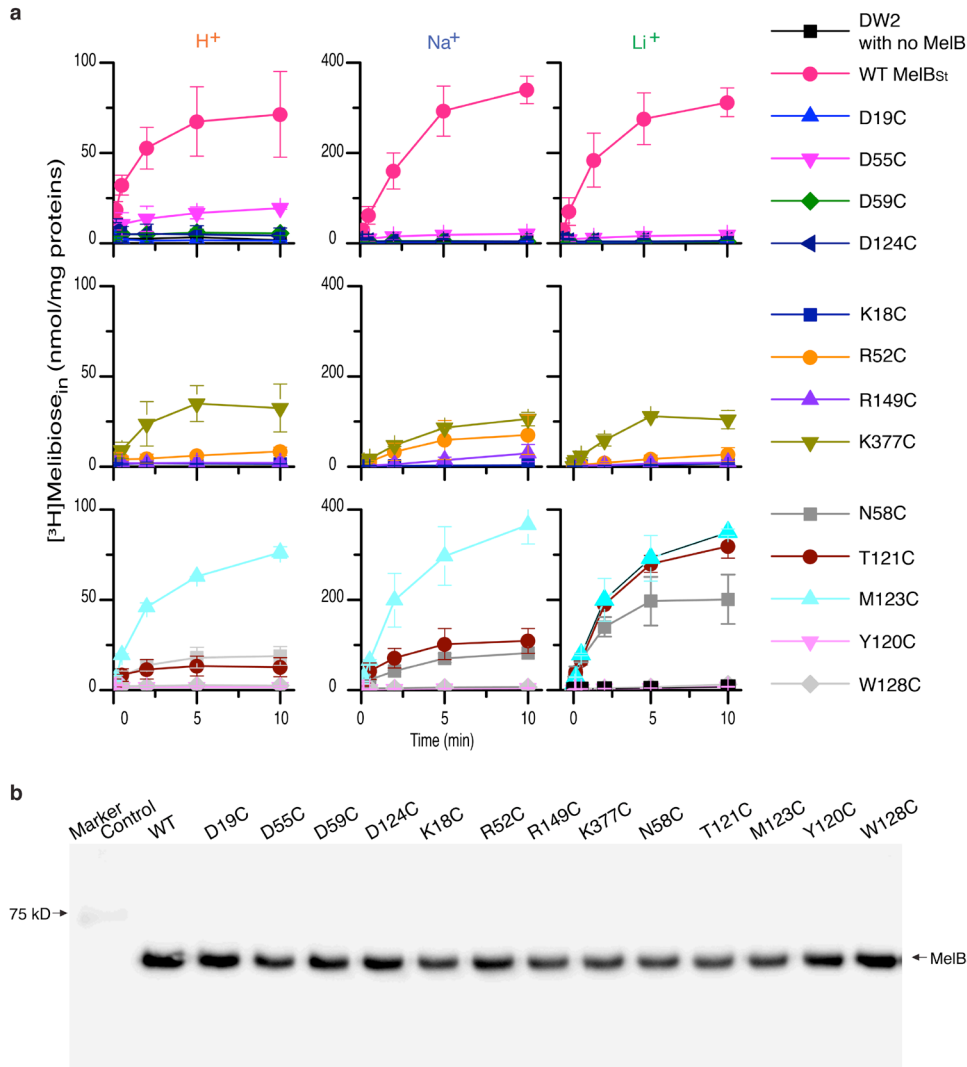

**Supplementary Figure S6 | Mutational analysis. a, Melibiose transport time course.** Intact *E. coli* DW2 cells (*melA*<sup>+</sup>,  $\Delta melB$ ,  $\Delta lacZY$ ), over-expressing WT MelB<sub>St</sub> or a given single-site Cys mutant, were assayed with [<sup>3</sup>H]melibiose transport (0.4 mM) in the absence or presence of 20 mM NaCl or LiCl. Error bar, s.e.m., n = 2 for mutants and n = 10 for the WT and DW2. **b, Western blotting.** 25  $\mu\text{g}$  of RSO membranes were loaded onto each well of SDS-16% PAGE. MelB<sub>St</sub> proteins were detected with anti-His tag antibody, and imaged by the *ImageQuant LAS 4000 Biomolecular Imager*. Protein marker with 75 kD is loaded on the same well with the negative control sample that contains the RSO vesicles prepared from DW2 cells without MelB.

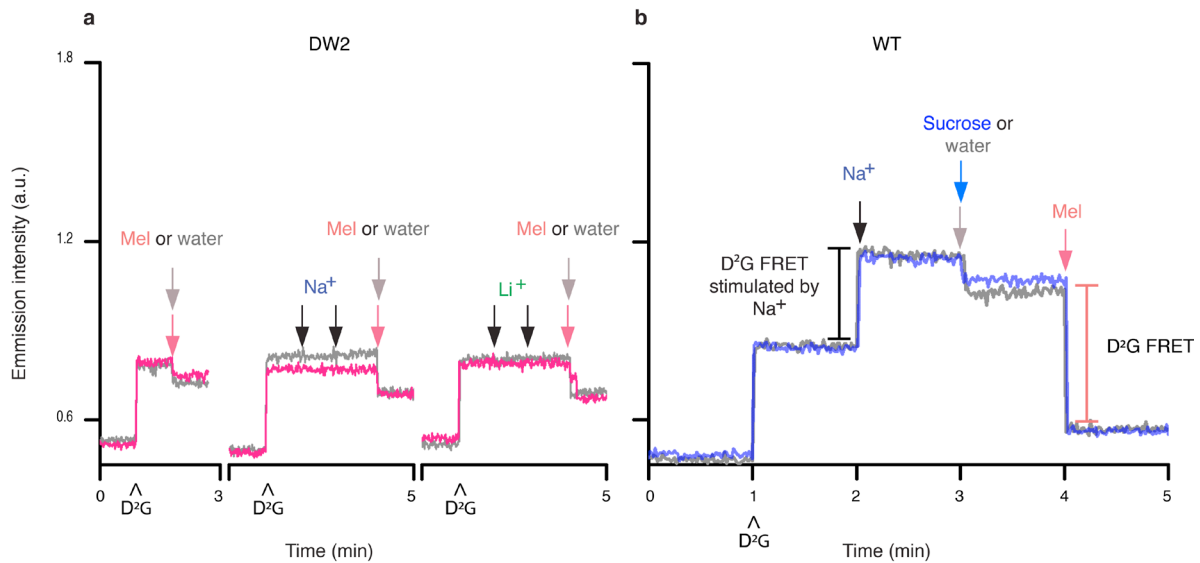

**Supplementary Figure S7 | Control experiments for Trp→D<sup>2</sup>G FRET.** Experimental setup was identical as described in Fig. 3d. **a, The negative control experiments.** RSO vesicles prepared with DW2 cells in the absence of MelB were used as the negative control. The assay was carried out under identical protocol as described in Fig. 3d. **b, Specificity.** RSO vesicles prepared with DW2 cells in the presence of MelB<sub>St</sub> were used as the positive control. After the addition of 10 μM D<sup>2</sup>G, 20 mM NaCl, 120 mM sucrose or the same volume of water were added step by step. For both traces, 120 mM melibiose was added at the last step. The Na<sup>+</sup> stimulation of D<sup>2</sup>G FRET and melibiose displacement of D<sup>2</sup>G bound with MelB<sub>St</sub> are illustrated by black and pink blunt-ended bars, respectively.



**A** MelB (4M64-A)

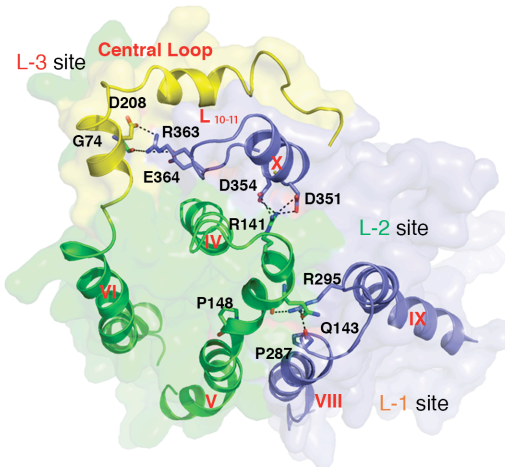

**B** XylE (Outward occluded, 4GBY)

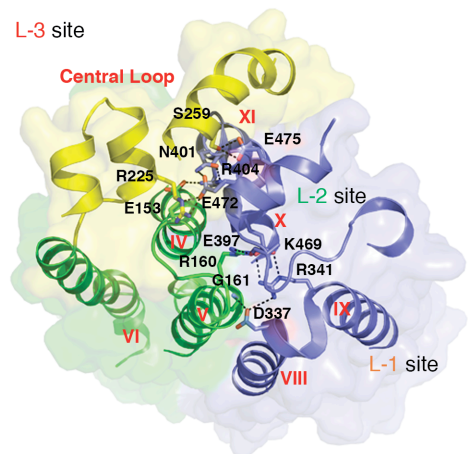

**C** FucP (Outward, 3O7Q)

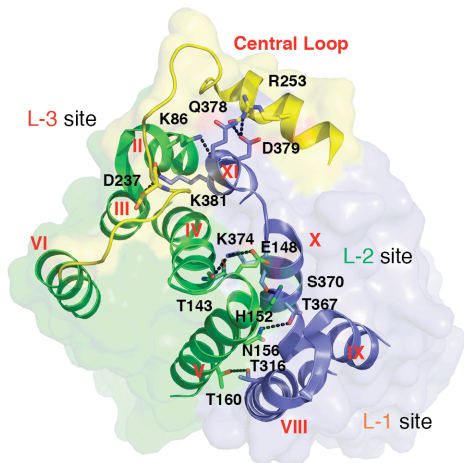

**D** XylE (Inward partially occluded, 4JA3)

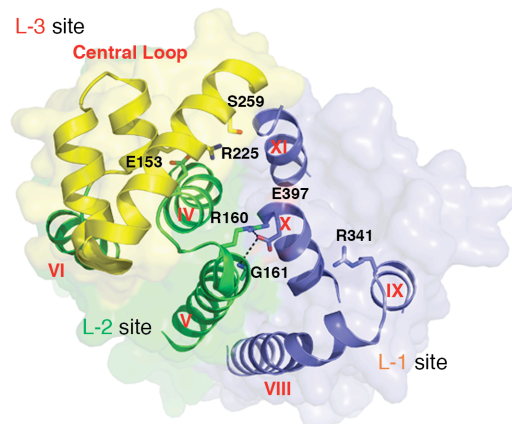

**E** PiPT (Inward occluded, 4J05)

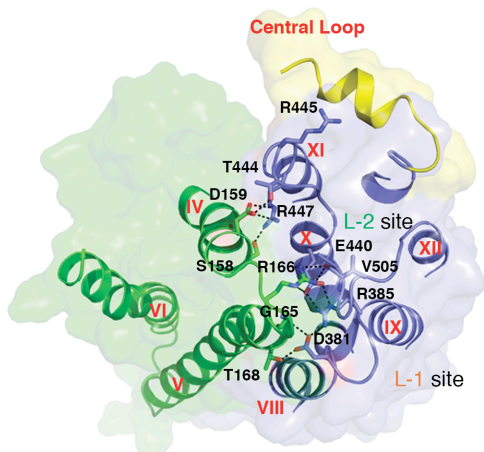

**F** XylE (Partial inward, 4JA4)

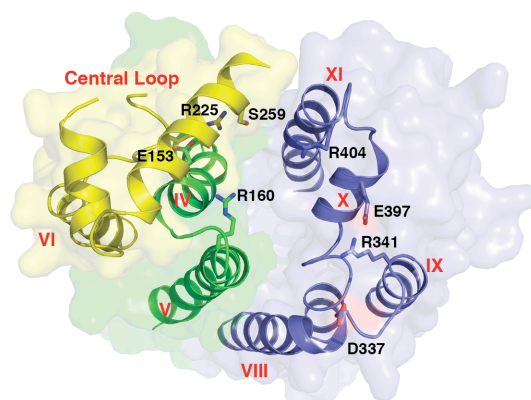

**Supplementary Figure S8 | Locks in MFS crystal structures.** Surface presentation of all structures with an aligned origin: the N- and C-terminal domains are shown in green and blue, respectively, with the central loop in yellow. The helices are labeled with Roman numerals. Lock interactions are shown as broken lines. All structures are viewed from the cytoplasmic side.
